# Supplementary material for: Novel Animal Model of Crumbs-Dependent Progressive Retinal Degeneration That Targets Specific Cone Subtypes
Source: PubMed Central journal article supplement — Invest Ophthalmol Vis Sci. 2018 Jan;59(1):505–18. doi: 10.1167/iovs.17-22572 (PMC5786287; doi:10.1167/iovs.17-22572), 2018-01
Supplement: iovs-59-01-09_s02.pdf [file iovs-59-01-09_s02.pdf]

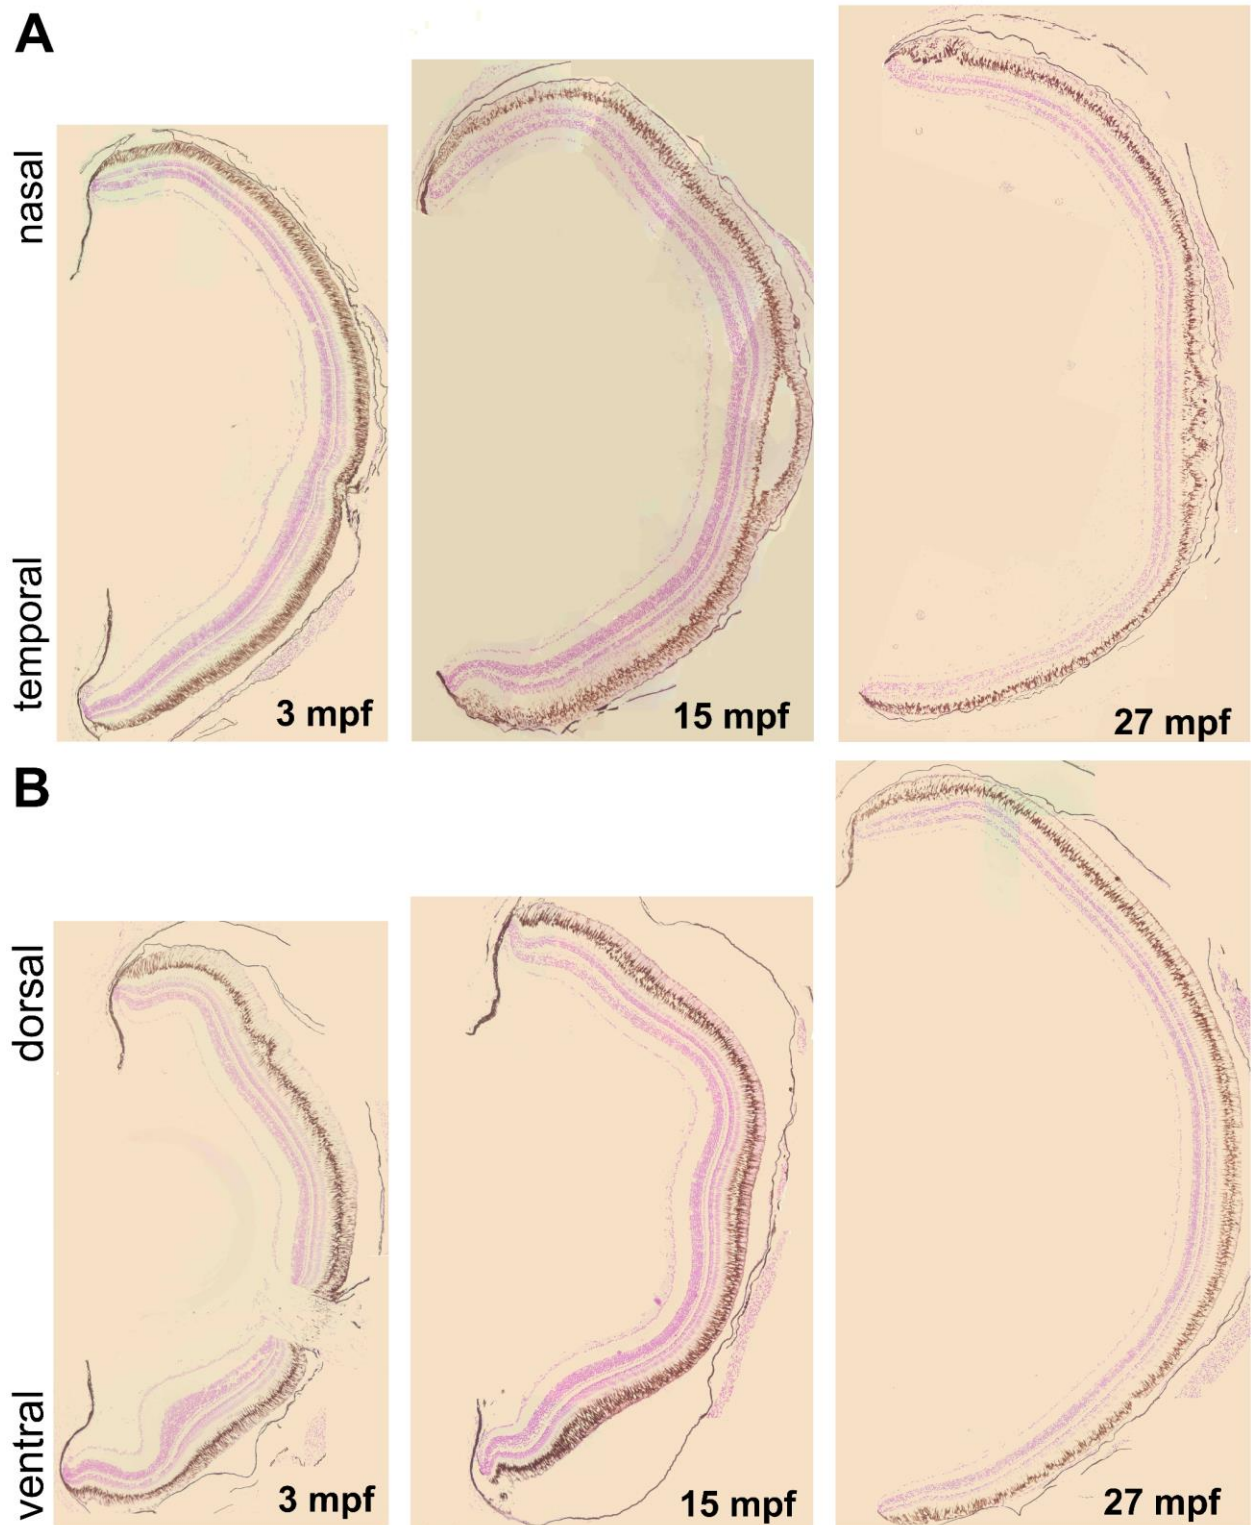

**Supplementary Figure S1. Histology and growth of the adult zebrafish retina.** JB4-Feulgen of retinal sections from wildtype zebrafish at 3, 15, and 27 mpf. **A.** Nasal-temporal retinal sections. **B.** Ventral-dorsal retinal sections.
