# Supplementary material for: Novel Animal Model of Crumbs-Dependent Progressive Retinal Degeneration That Targets Specific Cone Subtypes
Source: PubMed Central journal article supplement — Invest Ophthalmol Vis Sci. 2018 Jan;59(1):505–18. doi: 10.1167/iovs.17-22572 (PMC5786287; doi:10.1167/iovs.17-22572), 2018-01
Supplement: iovs-59-01-09_s05.pdf [file iovs-59-01-09_s05.pdf]

## ventral intermediate

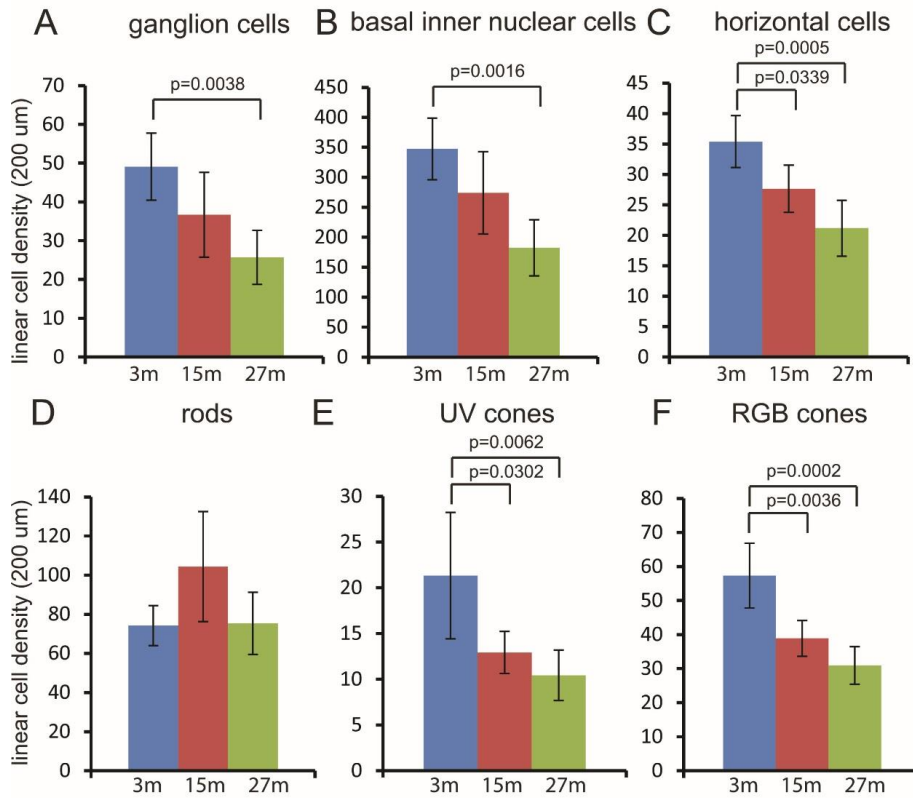

## ventral peripheral

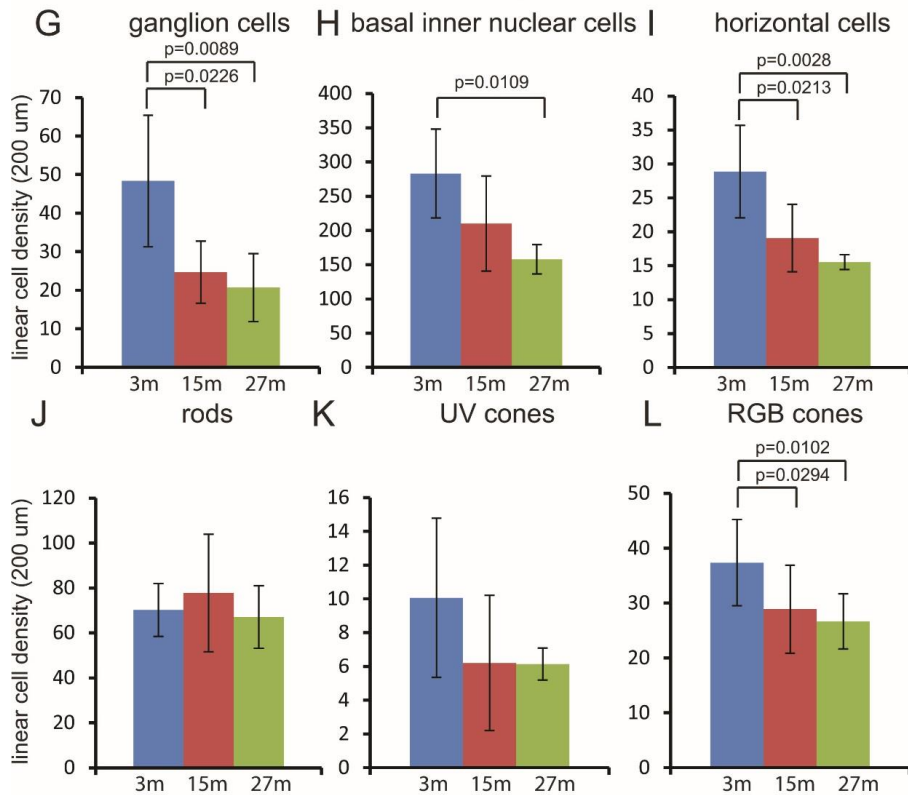

Supplementary Figure 5

**Supplementary Figure S5. Age-related changes of linear cell density in ventral intermediate and ventral peripheral areas.**

Statistical analysis with ANOVA and a post-hoc Tukey HSD test. Mean  $\pm$  1 s.d., n=5.
