# Supplementary material for: Novel Animal Model of Crumbs-Dependent Progressive Retinal Degeneration That Targets Specific Cone Subtypes
Source: PubMed Central journal article supplement — Invest Ophthalmol Vis Sci. 2018 Jan;59(1):505–18. doi: 10.1167/iovs.17-22572 (PMC5786287; doi:10.1167/iovs.17-22572), 2018-01
Supplement: iovs-59-01-09_s06.pdf [file iovs-59-01-09_s06.pdf]

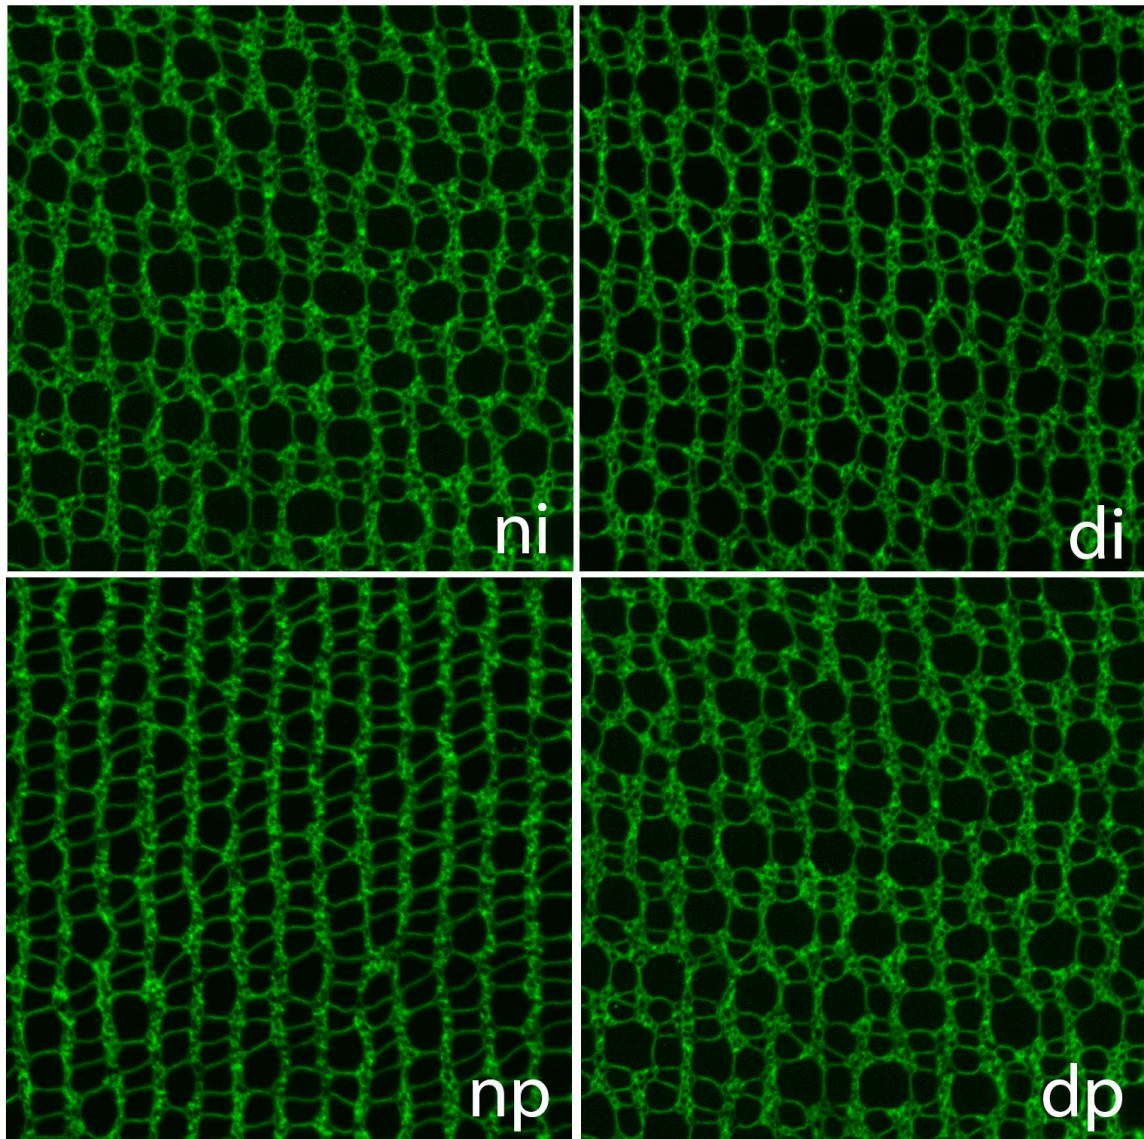

**Supplementary Figure S6. Planar patterning of cones in young adult retina indicates normal photoreceptor genesis in pt108b line.**

**A-B'.** Flat-mount retinal preparation from a pt108b fish at 4 mpf, illustrating four retinal areas: nasal-intermediate (A), nasal-peripheral (A'), dorsal-intermediate (B), and dorsal-peripheral (B').

All cone photoreceptor types were generated and positioned normally as evidenced by the distinctive mosaic pattern that matches wild-type retina (compare to Figure 4). Arrows indicate

UV cones; R, red cones; G, green cones; and B, blue cones. Scale bar: 20  $\mu$ m.
