# Supplementary material for: Novel Animal Model of Crumbs-Dependent Progressive Retinal Degeneration That Targets Specific Cone Subtypes
Source: PubMed Central journal article supplement — Invest Ophthalmol Vis Sci. 2018 Jan;59(1):505–18. doi: 10.1167/iovs.17-22572 (PMC5786287; doi:10.1167/iovs.17-22572), 2018-01
Supplement: iovs-59-01-09_s07.pdf [file iovs-59-01-09_s07.pdf]

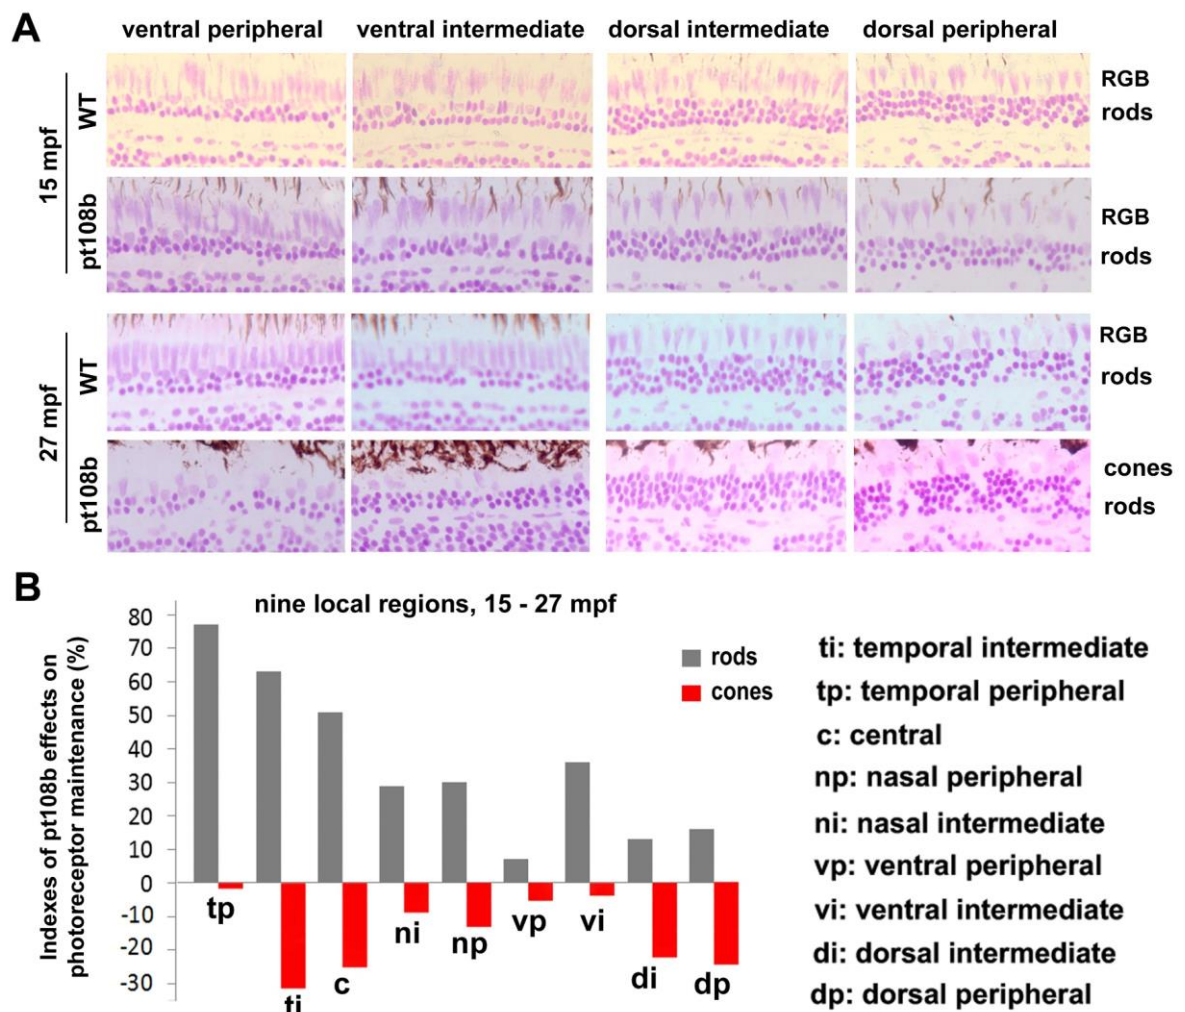

**Supplementary Figure S7. Topographical analysis of the index of *pt108b* effects on photoreceptor maintenance.**

**A.** JB4-Feulgen staining of photoreceptors of ventral and dorsal retinal regions in wildtype and *pt108b* at 15 and 27 mpf. **B.** Across the retina, *pt108b* genetic background promotes rod overpopulation and cone degeneration. See Figure 6C for formula to calculate the photoreceptor maintenance index.
