# Supplementary material for: Novel Animal Model of Crumbs-Dependent Progressive Retinal Degeneration That Targets Specific Cone Subtypes
Source: PubMed Central journal article supplement — Invest Ophthalmol Vis Sci. 2018 Jan;59(1):505–18. doi: 10.1167/iovs.17-22572 (PMC5786287; doi:10.1167/iovs.17-22572), 2018-01
Supplement: iovs-59-01-09_s08.pdf [file iovs-59-01-09_s08.pdf]

**Supplementary Table S1. Linear cell density by region in adult zebrafish retina**

| region                | age (mpf) | cell types     |                           |                  |            |          |           |
|-----------------------|-----------|----------------|---------------------------|------------------|------------|----------|-----------|
|                       |           | ganglion cells | basal inner nuclear layer | horizontal cells | rods       | UV cones | RGB cones |
| temporal peripheral   | 3         | 40.5±5.3       | 249.5±57.9                | 25.7±4.7         | 61.4±14.2  | 11.7±3.8 | 32.6±2.6  |
|                       | 15        | 24.4±4.9       | 217.3±45.9                | 19.2±4.0         | 84.8±10.9  | 8.2±2.9  | 26.9±4.6  |
|                       | 27        | 16.5±3.3       | 155.9±67.4                | 15.9±6.3         | 65.4±6.7   | 6.5±3.8  | 19.8±7    |
| temporal intermediate | 3         | 51.6±12.4      | 302.4±80.7                | 32.7±5.6         | 77.3±19.5  | 17.3±0.5 | 57.1±11.5 |
|                       | 15        | 35.8±6.7       | 251.9±58.8                | 25.5±7.8         | 101.9±15.1 | 11.5±3.5 | 29.6±6.9  |
|                       | 27        | 27.7±10.7      | 180.9±49.8                | 20±6.1           | 74.1±4.4   | 10.7±3.4 | 27.9±7.3  |
| central               | 3         | 46.7±11.4      | 284.2±44.9                | 36±5.3           | 98.6±17.1  | 14.7±3.1 | 56.7±7.5  |
|                       | 15        | 37.4±9.4       | 240.2±33.2                | 31.5±4.8         | 145.4±29.6 | 13.5±1.7 | 40.3±6.9  |
|                       | 27        | 29.7±10.5      | 175.1±42.6                | 23±5.1           | 99.8±10    | 11.5±3.2 | 39.3±8.7  |
| nasal intermediate    | 3         | 31.9±11.5      | 198.3±34.1                | 24.7±3.2         | 118.5±19.9 | 10.2±1.9 | 34.4±3.7  |
|                       | 15        | 23.4±8.3       | 184.4±44.1                | 22.1±8.4         | 148.7±32.3 | 9.9±2.1  | 24.7±6.6  |
|                       | 27        | 13.8±2.9       | 124.5±32.2                | 14.7±1.6         | 135.1±23   | 6.7±0.7  | 23.8±2.8  |
| nasal peripheral      | 3         | 25.4±5.5       | 190.9±46.7                | 22.6±3.5         | 108.9±20.1 | 9.0±1.7  | 30.2±4.3  |
|                       | 15        | 20.3±10.5      | 181.2±70.0                | 17.1±6.1         | 109.0±14.4 | 7.3±3.4  | 23.2±5.6  |
|                       | 27        | 10.7±3.4       | 107.4±25.7                | 10.7±2.1         | 120.5±12.1 | 5.3±2.8  | 18±3.2    |
| ventral peripheral    | 3         | 48.3±17.1      | 283.1±65                  | 28.9±6.8         | 70.2±11.7  | 10.1±4.7 | 40±4.1    |
|                       | 15        | 24.6±8.1       | 210.1±69.4                | 19.1±5.0         | 77.8±26.2  | 6.2±4.0  | 28.9±8.0  |
|                       | 27        | 20.7±8.7       | 129.7±21.5                | 15.5±1.1         | 67.1±14    | 6.1±0.9  | 26.7±5    |
| ventral intermediate  | 3         | 49.1±8.6       | 347.3±51.3                | 35.3±4.3         | 74.2±10.2  | 21.3±8   | 57.4±9.5  |
|                       | 15        | 36.7±10.9      | 274.0±68.6                | 27.6±3.9         | 104.4±28.1 | 12.9±2.3 | 38.9±5.2  |
|                       | 27        | 25.7±7         | 182.4±46.9                | 21.2±4.6         | 75.4±15.8  | 10.4±2.8 | 30.9±5.5  |
| dorsal intermediate   | 3         | 36.2±5.5       | 245.3±44.6                | 27.6±6.4         | 129±20.1   | 12.8±1   | 39±6.3    |
|                       | 15        | 20.9±4.0       | 176.4±37.1                | 19.5±4.0         | 164.5±15.2 | 9.4±1.7  | 32.3±8.5  |
|                       | 27        | 21.7±4.4       | 132.9±23.8                | 15.6±3.8         | 133.5±23.2 | 7.7±1.5  | 25.4±3.5  |
| dorsal peripheral     | 3         | 29.7±7.5       | 219.7±34.6                | 22.1±3.1         | 119.7±17.3 | 12.8±2.5 | 32±6.1    |
|                       | 15        | 18.0±2.8       | 162.1±27.9                | 14.6±3.0         | 146.9±20.0 | 6.6±1.9  | 24.7±3.9  |
|                       | 27        | 9.7±4          | 110.1±18.6                | 10.9±2.9         | 126.4±12   | 4.9±2.1  | 21.3±1.7  |

**Supplementary Table S1. Linear cell density by region in adult zebrafish retina.**

Nuclear counts (# per 200 μm linear segment) in retinal sections. Means ± 1 s.d., n=5, for six retinal cell categories in nine local regions at 3, 15, and 27 mpf.
