# Supplementary material for: Novel Animal Model of Crumbs-Dependent Progressive Retinal Degeneration That Targets Specific Cone Subtypes
Source: PubMed Central journal article supplement — Invest Ophthalmol Vis Sci. 2018 Jan;59(1):505–18. doi: 10.1167/iovs.17-22572 (PMC5786287; doi:10.1167/iovs.17-22572), 2018-01
Supplement: iovs-59-01-09_s09.pdf [file iovs-59-01-09_s09.pdf]

**Supplementary Table S2 Linear cell density comparison within quadrant ANOVA with post-hoc Tukey HSD test**

|      | dorsal |               |               | ventral |        |               | nasal |               |               | temporal |        |               |
|------|--------|---------------|---------------|---------|--------|---------------|-------|---------------|---------------|----------|--------|---------------|
|      |        | Int.          | Per.          |         | Int.   | Per.          |       | Int.          | Per.          |          | Int.   | Per.          |
| GC   | Cent.  | <i>0.0438</i> | <b>0.0098</b> | Cent.   | 1      | 0.228         | Cent. | 0.1385        | <i>0.0334</i> | Cent.    | 1      | 0.2083        |
|      | Int.   |               | 0.9996        | Int.    |        | 0.2947        | Int.  |               | 0.9994        | Int.     |        | 0.361         |
|      |        | Int.          | Per.          |         | Int.   | Per.          |       | Int.          | Per.          |          | Int.   | Per.          |
| bINC | Cent.  | 0.6147        | 0.3501        | Cent.   | 0.9823 | 0.9916        | Cent. | 0.7614        | 0.7051        | Cent.    | 1      | 0.9987        |
|      | Int.   |               | 1             | Int.    |        | 0.6104        | Int.  |               | 1             | Int.     |        | 0.9799        |
|      |        | Int.          | Per.          |         | Int.   | Per.          |       | Int.          | Per.          |          | Int.   | Per.          |
| HC   | Cent.  | <i>0.0443</i> | <b>0.0009</b> | Cent.   | 0.9816 | <i>0.032</i>  | Cent. | 0.2152        | <b>0.0074</b> | Cent.    | 0.7774 | <i>0.0354</i> |
|      | Int.   |               | 0.8778        | Int.    |        | 0.2839        | Int.  |               | 0.8825        | Int.     |        | 0.6818        |
|      |        | Int.          | Per.          |         | Int.   | Per.          |       | Int.          | Per.          |          | Int.   | Per.          |
| rod  | Cent.  | 0.9128        | 1             | Cent.   | 0.1284 | <b>0.001</b>  | Cent. | 1             | 0.2415        | Cent.    | 0.0877 | <b>0.0041</b> |
|      | Int.   |               | 0.9432        | Int.    |        | 0.6397        | Int.  |               | 0.1571        | Int.     |        | 0.9519        |
|      |        | Int.          | Per.          |         | Int.   | Per.          |       | Int.          | Per.          |          | Int.   | Per.          |
| UV   | Cent.  | 0.3072        | <b>0.0081</b> | Cent.   | 1      | <b>0.0041</b> | Cent. | 0.5031        | <i>0.0244</i> | Cent.    | 0.9523 | <i>0.0813</i> |
|      | Int.   |               | 0.8036        | Int.    |        | <i>0.0107</i> | Int.  |               | 0.844         | Int.     |        | 0.6232        |
|      |        | Int.          | Per.          |         | Int.   | Per.          |       | Int.          | Per.          |          | Int.   | Per.          |
| RGB  | Cent.  | 0.5671        | <i>0.0121</i> | Cent.   | 1      | 0.1446        | Cent. | <i>0.0125</i> | <b>0.0045</b> | Cent.    | 0.2068 | <i>0.0482</i> |
|      | Int.   |               | 0.634         | Int.    |        | 0.2817        | Int.  |               | 1             | Int.     |        | 0.9988        |
|      |        | Int.          | Per.          |         | Int.   | Per.          |       | Int.          | Per.          |          | Int.   | Per.          |

**Supplementary Table S2. Linear cell density comparison within quadrant ANOVA with post-hoc Tukey HSD test.**

The differences in linear densities of six retinal cell categories in the radial dimension within local retinal regions in 15 mpf retina

(n=5) were evaluated statistically with ANOVA and a post-hoc Tukey HSD test. p values  $\leq 0.1$  (red);  $\leq 0.05$  (red, *italic*);  $\leq 0.01$  (**red,**

**bold**);  $\leq 0.001$  (*red, bold, italic*).
