# Supplementary material for: Novel Animal Model of Crumbs-Dependent Progressive Retinal Degeneration That Targets Specific Cone Subtypes
Source: PubMed Central journal article supplement — Invest Ophthalmol Vis Sci. 2018 Jan;59(1):505–18. doi: 10.1167/iovs.17-22572 (PMC5786287; doi:10.1167/iovs.17-22572), 2018-01
Supplement: iovs-59-01-09_s10.pdf [file iovs-59-01-09_s10.pdf]

**Supplementary Table S3 Linear cell density comparison between quadrant ANOVA with post-hoc Tukey HSD test**

|      |         | intermediate  |               |               | peripheral |               |        |              |
|------|---------|---------------|---------------|---------------|------------|---------------|--------|--------------|
|      |         | ventral       | nasal         | temporal      |            | ventral       | nasal  | temporal     |
| GC   | dorsal  | <b>0.062</b>  | 0.9998        | <b>0.0921</b> | dorsal     | 0.9095        | 0.9999 | 0.9252       |
|      | ventral |               | 0.1855        | 1             | ventral    |               | 0.9929 | 1            |
|      | nasal   |               |               | 0.2562        | nasal      |               |        | 0.9952       |
| bINC |         | ventral       | nasal         | temporal      |            | ventral       | nasal  | temporal     |
|      | dorsal  | 0.1183        | 1             | 0.3948        | dorsal     | 0.8774        | 0.9997 | 0.7709       |
|      | ventral |               | 0.1914        | 0.999         | ventral    |               | 0.9937 | 1            |
|      | nasal   |               |               | 0.5426        | nasal      |               |        | 0.9736       |
| HC   |         | ventral       | nasal         | temporal      |            | ventral       | nasal  | temporal     |
|      | dorsal  | 0.3524        | 0.998         | 0.7378        | dorsal     | 0.9249        | 0.9977 | 0.9121       |
|      | ventral |               | 0.7992        | 0.9994        | ventral    |               | 0.9997 | 1            |
|      | nasal   |               |               | 0.9857        | nasal      |               |        | 0.9995       |
| rod  |         | ventral       | nasal         | temporal      |            | ventral       | nasal  | temporal     |
|      | dorsal  | <b>0.0045</b> | 0.9685        | <b>0.0027</b> | dorsal     | <b>0.0007</b> | 0.1994 | <b>0.003</b> |
|      | ventral |               | <b>0.0785</b> | 1             | ventral    |               | 0.4329 | 0.9999       |
|      | nasal   |               |               | <b>0.0521</b> | nasal      |               |        | 0.7436       |
| UV   |         | ventral       | nasal         | temporal      |            | ventral       | nasal  | temporal     |
|      | dorsal  | 0.5105        | 1             | 0.9469        | dorsal     | 1             | 1      | 0.9905       |
|      | ventral |               | 0.725         | 0.9943        | ventral    |               | 0.999  | 0.9596       |
|      | nasal   |               |               | 0.9926        | nasal      |               |        | 0.9999       |
| RGB  |         | ventral       | nasal         | temporal      |            | ventral       | nasal  | temporal     |
|      | dorsal  | 0.7855        | 0.6404        | 0.999         | dorsal     | 0.9797        | 1      | 0.9998       |
|      | ventral |               | <b>0.0312</b> | 0.3778        | ventral    |               | 0.8913 | 0.9999       |
|      | nasal   |               |               | 0.95          | nasal      |               |        | 0.9912       |

**Supplementary Table S3. Linear cell density comparison between quadrant ANOVA with post-hoc Tukey HSD test.**

The differences in linear densities of six retinal cell categories for intermediate and peripheral regions in the circumferential dimension across local retinal regions in 15 mpf retina (n=5) were evaluated statistically with ANOVA and a post-hoc Tukey HSD test. p values  $\leq 0.1$  (red);  $\leq 0.05$  (red, *italic*);  $\leq 0.01$  (**red, bold**);  $\leq 0.001$  (**red, bold, italic**).
