# Supplementary material for: Novel Animal Model of Crumbs-Dependent Progressive Retinal Degeneration That Targets Specific Cone Subtypes
Source: PubMed Central journal article supplement — Invest Ophthalmol Vis Sci. 2018 Jan;59(1):505–18. doi: 10.1167/iovs.17-22572 (PMC5786287; doi:10.1167/iovs.17-22572), 2018-01
Supplement: iovs-59-01-09_s11.pdf [file iovs-59-01-09_s11.pdf]

**Supplementary Table S4 Cone planar cell density ANOVA with post-hoc Tukey HSD test**

| dorsal       |               |               | ventral       |         |         | nasal         |          |               | temporal |               |               |
|--------------|---------------|---------------|---------------|---------|---------|---------------|----------|---------------|----------|---------------|---------------|
|              | Int.          | Per.          |               | Int.    | Per.    |               | Int.     | Per.          |          | Int.          | Per.          |
| Cent.        | <i>0.0231</i> | <b>0.0033</b> | Cent.         | 0.9386  | 0.6566  | Cent.         | 0.1803   | <b>0.0013</b> | Cent.    | 1             | <i>0.018</i>  |
| Int.         |               | 0.9863        | Int.          |         | 0.1128  | Int.          |          | 0.3041        | Int.     |               | <i>0.0383</i> |
| intermediate |               |               |               |         |         | peripheral    |          |               |          |               |               |
|              | ventral       | nasal         | temporal      |         | ventral | nasal         | temporal |               | ventral  | nasal         | temporal      |
| dorsal       | <b>0.0018</b> | 0.9692        | <i>0.0488</i> | dorsal  | 0.1294  | 0.9999        | 0.9943   | dorsal        | 0.1294   | 0.9999        | 0.9943        |
| ventral      |               | <i>0.0172</i> | 0.7804        | ventral |         | <b>0.0566</b> | 0.4611   | ventral       |          | <b>0.0566</b> | 0.4611        |
| nasal        |               |               | 0.3252        | nasal   |         |               | 0.9281   | nasal         |          |               | 0.9281        |

**Supplementary Table S4. Cone planar cell density ANOVA with post-hoc Tukey HSD test.**

The differences in planar cone densities among local retinal regions in 6 mpf retina (n=3) were evaluated statistically with ANOVA and a post-hoc Tukey HSD test. Comparisons between quadrants and within quadrants are shown. p values  $\leq 0.1$  (red);  $\leq 0.05$  (red, *italic*);  $\leq 0.01$  (red, bold).
